# Supplementary material for: Molecular Dynamic Study of Mechanism Underlying Nature of Molecular Recognition and the Role of Crosslinker in the Synthesis of Salmeterol-Targeting Molecularly Imprinted Polymer for Analysis of Salmeterol Xinafoate in Biological Fluid
Source: MDPI journal article supplement (doi:10.3390/molecules27113619), 2022-06-05
Supplement: s1 [file s1]

## Supplementary Material

**Table S1.** The Compositions of synthesized MIPs and NIPs using precipitation polymerization.

| Polymers | Template (T) | Functional Monomer (FM) | Crosslinker (Cl) | Ratio T:FM:Cl(mol) |
|----------|--------------|-------------------------|------------------|--------------------|
| MIP1     | SLX          | HEMA                    | EGDMA            | 1:6:20             |
| NIP1     | -            | HEMA                    | EGDMA            | 1:6:20             |
| MIP2     | SLX          | HEMA                    | EGDMA            | 1:4:20             |
| NIP2     | -            | HEMA                    | EGDMA            | 1:4:20             |
| MIP3     | SLX          | HEMA                    | TRIM             | 1:6:20             |
| NIP3     | -            | HEMA                    | TRIM             | 1:6:20             |
| MIP4     | SLX          | HEMA                    | TRIM             | 1:4:20             |
| NIP4     | -            | HEMA                    | TRIM             | 1:4:20             |
